# Supplementary material
Source: publisher figshare collection journal article supplement (https://gsapubs.figshare.com/ndownloader/files/22276935)
Supplement: Supplementary file 1 [file 22276935]

## Sheet: Sheet1
Sample Num.	SLP15	SLP1302	SLP1308	99-C15	XB-24	SL0630	CZ20	XR01-1	G8	C10	C25	MBL15	DR01-1	DR01-2	DR03	DR04
Location	Sailipu	Sailipu	Sailipu	Sailipu	Sailipu	Sailipu	Chazi	Chazi	Chazi	Chazi	Chazi	Mibale	Mibale	Mibale	Mibale	Mibale
Latitude	31°17'45.10"	31°26′7.37″	31°22′6.24″	31°18′6.13″	31°20′13.42″	31°17.8′	30°4'20"	86°30.8′	-	-	-	30°51'52.57"	30°56.6′	30°56.6′	30°56.6′	30°56.6′
Longtitude	82°58'28.29"	82°44′20.23″	82°40′10.76″	82°44′50.35″	82°52′37.16″	82°58.5′	86°30'50"	30°4.3′	-	-	-	86°39'56.15"	86°23.5′	86°23.5′	86°23.5′	86°23.5′
Age(Ma):	-	16.97	16.97	16.97	16.97	-	-	-	10.94	10.94	10.94	-	-	-	-	-
Reference	This study	Guo et al. (2015)	Guo et al. (2015)	Guo et al. (2015)	Guo et al. (2015)	Zhao et al. (2009)	This study	Zhao et al. (2009)	Guo et al. (2013)	Guo et al. (2013)	Guo et al. (2013)	This study	Zhao et al. (2009)	Zhao et al. (2009)	Zhao et al. (2009)	Zhao et al. (2009)
SiO2	56.2	56.8	55.67	55.45	56.78	54.07	59.75	59.4	57.81	56.14	57.18	61.33	61.62	59.08	60.98	59.28
TiO2	1.364	1.54	1.56	1.66	1.52	1.59	1.064	0.99	1.12	1.43	1.62	1.074	0.88	0.93	0.9	0.88
Al2O3	12.25	12.03	13.7	13.48	11.47	12.5	13.23	13.76	13.67	12.57	12.09	13.27	14.13	13.55	13.92	13.92
Fe2O3total	6.5618	5.93	6.94	6.35	5.98	6.72	5.27	5.23	6.24	6.47	5.52	5.39626	3.9	4.19	3.98	3.95
FeOtotal	5.90431	5.33581	6.24461	5.71373	5.3808	6.04666	4.74195	4.70595	5.61475	5.82171	4.9669	4.85712	3.50922	3.77016	3.5812	3.55421
MnO	0.106	0.09	0.15	0.11	0.13	0.1	0.077	0.08	0.11	0.14	0.14	0.067	0.06	0.07	0.06	0.06
MgO	7.57	8.2	7.55	8.08	8.75	9.51	4.44	3.81	5.9	6.19	6.61	3.44	2.5	2.91	2.53	2.62
CaO	5.2	4.83	5.3	5.86	4.85	5.45	5.83	4.68	6.44	6.85	6.75	4.008	2.79	3.72	3.29	2.92
Na2O	1.77	2.13	2.71	1.9	2.29	1.69	2.42	3.11	2.68	2.14	2.48	2.467	2.69	2.71	2.59	2.37
K2O	5.8	7.29	5.61	6.47	6.96	6.6	7.05	7.41	5.29	7.16	6.49	7.782	8.67	8.31	8.46	8.83
P2O5	0.9	1.18	0.82	0.63	1.28	0.94	0.63	0.56	0.74	0.91	1.12	0.611	0.53	0.57	0.54	0.56
LOI	0.89	0.86	0.26	0.92	1.79	0.47	0.14	0.53	1.28	0.79	0.93	0.51	1.24	2.81	2.27	2.74
Mg#	0.697685	0.77	0.73	0.76	0.78	0.738928	0.602624	0.59305	0.7	0.7	0.75	0.560407	0.561798	0.581419	0.559735	0.570185
La	102	104	101	90.2	84.1	118.5	108.165	112	142.4	131.6	102.7	201.692	217.1	204	208.4	220.7
Ce	264	289	244	237	225	310	244.732	243	365.3	327.8	241.8	417.939	433	411	416	446
Pr	36.5	46.5	33.5	34.9	33.2	46.3	31.2051	33.5	50.7	46.3	34.1	48.2971	51.6	50.3	50.7	49
Nd	162	227	149	161	152	206	123.528	136	206.5	182.5	139.3	179.509	191	187	188	177
Sm	31.5	47.6	26.7	38.4	40.6	40	21.4441	24.7	47.2	42.4	29.5	25.3854	25.5	25.6	25.2	23.7
Eu	4.85	6.55	3.77	6.18	7.06	6.11	3.92568	3.78	6.11	5.55	3.39	4.46579	4.21	4.34	4.22	4.25
Gd	14.9	24.1	15.3	26.2	32.9	19.5	12.6583	15.7	25.8	23.9	14.8	13.9	17.8	17.7	17.6	16.6
Tb	1.4	2.38	1.61	2.52	2.37	1.83	1.36887	1.66	2.37	2.67	1.36	1.32085	1.55	1.56	1.54	1.44
Dy	5.85	8.36	6	6.84	7.92	7.3	6.00607	7	8.86	10.12	6.29	5.31504	6	6.2	5.9	5.7
Ho	1	1.29	0.97	0.78	1.22	1.12	0.969489	0.99	1.39	1.53	0.95	0.858885	0.77	0.8	0.77	0.74
Er	2.62	2.97	2.32	1.92	2.78	2.74	2.36897	2.62	2.94	3.64	2.14	2.12667	2.21	2.28	2.21	2.03
Tm	0.324	0.37	0.3	0.26	0.36	0.35	0.299802	0.3	0.38	0.46	0.28	0.278314	0.23	0.24	0.24	0.23
Yb	1.91	2.18	1.8	1.68	2.29	2.13	1.80832	1.96	2.31	2.68	1.77	1.76648	1.52	1.57	1.54	1.52
Lu	0.277	0.31	0.26	0.23	0.33	0.29	0.256057	0.29	0.35	0.37	0.27	0.248201	0.23	0.24	0.23	0.22
Sc	17.6	18.2	16.4	19.8	16.3	18.25	15.1358	12.7	18.47	16.39	18.63	11.4413	8.4	9.4	8.6	9.4
V	133	112	127	172	183	144.69	146.21	75	136.23	151.79	131.47	96.8446	64	72	65	76
Cr	461	460	289	538	358	496	134.826	147	278.46	294.43	393.26	149.973	70	92	74	82
Co	28.9	31.9	33.4	40.5	39.2	33	23.4336	43	31.38	26.84	27.04	19.8129	44	43	54	54
Ni	240	306	220	387	353	144.46	73.5439	83	169.27	184.73	187.28	88.7318	52	64	53	61
Cu	34	40.5	23.6	42.2	66.6	20	98.0664	31	61.84	58.31	35.87	37.2302	30	27	29	29
Zn	84	92.6	104	69.5	91.7	85	248.334	77	58.32	21.97	14.31	82.0731	63	64	62	66
Ga	19	24	23.2	23.2	26.4	22.09	21.4521	21.4	27.21	26.54	25.36	24.3521	25.4	24.1	24.9	25.5
Rb	503	928	503	867	709	601	486.92	650	725.4	938.3	498.4	408.154	435	419	416	459
Sr	894	732	912	801	758	939	1252.93	893	636.7	879.4	676.1	1294.14	967	1075	1283	1286
Y	25	33.4	24.4	18.5	36.9	30.4	24.6792	27.8	34.2	46.8	24.6	20.8197	20.8	21.6	20.5	20.9
Zr	548	722	618	637	784	621	492.306	484	838.1	481.2	412.7	704.135	898	849	903	868
Nb	24.7	35.2	34.9	18.3	16.4	34.48	25.5818	30.2	33.8	27.7	26.5	38.8832	60.1	53.8	58.5	52.8
Ba	2174	2795	2501	2113	2739	2480.37	2151.38	1737	2619.5	1973.2	1785.4	3342.77	3038	3354	3299	3966
Hf	14.1	20.6	17.9	9.03	20.3	16.9	14.3094	13.8	21.6	13.9	12.9	20.8335	26.2	24.5	26.7	24
Ta	1.39	2.09	2.36	1.51	1.65	1.88	1.85157	2.13	2.23	1.81	1.66	2.30903	3.42	3.05	3.36	3.13
Pb	55	78.9	89.2	71.1	79.7	44	195.738	71	146.4	98.6	71.7	126.099	154	167	182	220
Th	178	299	131	212	289	217.61	82.1922	112.1	138.7	123.3	149.3	107.35	158.6	139.2	152.4	172.2
U	23.3	40.6	15.6	36.2	41.2	25.01	14.196	27	21.9	21.8	16.5	13.0527	18.63	16.89	18.21	19.4
87Sr/86Sr	-	-	-	0.725834	0.724286	-	-	0.720068	0.729418	0.735896	0.736552	-	0.718431	0.718043	0.718299	-
143Nd/144Nd	-	-	-	0.511833	0.511857	-	-	0.511179	0.511856	0.511874	0.511826	-	0.511192	0.511198	0.511182	-
206Pb/204Pb	-	-	-	18.721	18.697	-	-	18.8957	18.8	18.94	18.99	-	18.4819	18.4694	18.4787	-
207Pb/204Pb	-	-	-	15.751	15.744	-	-	15.7785	15.7	15.82	15.85	-	15.7552	15.7485	15.754	-
208Pb/204Pb	-	-	-	39.772	39.808	-	-	39.6104	40.06	39.99	39.4	-	39.4794	39.4432	39.4705	-
Note. Mg# is average atomic Mg/(Mg+Fe), where Fe represents total Fe
